# Supplementary material for: Blimp-1 is essential for allergen-induced asthma and Th2 cell development in the lung
Source: PubMed Central journal article supplement — J Exp Med. 2020 May 12;217(7):e20190742. doi: 10.1084/jem.20190742 (PMC7336314; doi:10.1084/jem.20190742), 2020-05-12
Supplement: JEM_20190742_TableS1.pdf [file JEM_20190742_TableS1.pdf]

**Table S1. Antibodies for cell surface markers and intracellular cytokines/ transcription factors**

| <b>Flow antibodies</b>                        | <b>Source</b>            | <b>Identifier</b> |
|-----------------------------------------------|--------------------------|-------------------|
| anti-mouse CD16/CD32 (2.4G2)                  | BD Bioscience            | Cat# 553142       |
| LIVE/DEAD™ Fixable Blue Dead Cell Stain Kit   | Thermo Fisher Scientific | Cat# L34961       |
| BUV737 anti-mouse TCR Chain Hamster (H57-597) | BD Bioscience            | Cat# 564799       |
| Super Bright 600 anti-mouse CD44 (IM7)        | Thermo Fisher Scientific | Cat# 63-0441-82   |
| APC-eFluor 780 anti-mouse CD4 (RM4-5)         | Thermo Fisher Scientific | Cat# 47-0042-82   |
| BV421 anti-mouse CD90.1 (OX-7)                | BD Bioscience            | Cat# 563770       |
| Super Bright 780 anti-mouse CD90.2 (30-H12)   | Thermo Fisher Scientific | Cat# 78-0903-82   |
| BV785 anti-mouse CD45.1 (A20)                 | BioLegend                | Cat# 110743       |
| eFluor450 anti-mouse CD45.2 (104)             | Thermo Fisher Scientific | Cat# 48-0454-82   |
| Biotin anti-mouse CXCR5 (2G8)                 | BD Bioscience            | Cat# 551960       |
| APC Streptavidin                              | BD Bioscience            | Cat# 554067       |
| BV421 anti-mouse T-bet (O4-46)                | BD Bioscience            | Cat# 563318       |
| BV480 anti-mouse IFN- $\gamma$ (XMG1.2)       | BD Bioscience            | Cat# 566151       |
| Alexa Fluor 488 anti-mouse GATA3 (L50-823)    | BD Bioscience            | Cat# 560077       |
| PerCP-Cyanine5.5 anti-mouse IL-17A (eBio17B7) | Thermo Fisher Scientific | Cat# 45-7177-82   |
| PE anti-mouse ROR $\gamma$ t (B2D)            | Thermo Fisher Scientific | Cat# 12-6981-82   |
| PE-CF594 anti-mouse Bcl6 (K112-91)            | BD Bioscience            | Cat# 562401       |
| PE-Cyanine7 anti-mouse IL-13 (eBio13A)        | Thermo Fisher Scientific | Cat# 25-7133-82   |
| APC anti-mouse IL-10 (JES5-16E3)              | Thermo Fisher Scientific | Cat# 17-7101-82   |
| Alexa Fluor 700 anti-mouse FoxP3 (FJK-16s)    | Thermo Fisher Scientific | Cat# 56-5773-82   |
| Alexa Fluor 647 anti-mouse Blimp-1 (5E7)      | BD Bioscience            | Cat# 563643       |
| Alexa Fluor 488 anti-GFP                      | Thermo Fisher Scientific | Cat# A-21311      |
| PE-CF594 anti-mouse GATA3 (L50-823)           | BD Bioscience            | Cat# 563510       |
| PE anti-mouse GATA3 (TWAJ)                    | Thermo Fisher Scientific | Cat# 12-9966-42   |
| PE anti-mouse IL4 (11B11)                     | Thermo Fisher Scientific | Cat# 12-7041-41   |
